# Supplementary material for: Cu-Modified La2Si2O7/TiO2 composite materials: preparation, characterization and photothermal properties
Source: Royal Society of Chemistry journal article supplement (doi:10.1039/d2dt01138g), 2022-01-01
Supplement: d2dt01138g1.pdf [file d2dt01138g1.pdf]

## Supplementary Information

### **Cu-modified La<sub>2</sub>Si<sub>2</sub>O<sub>7</sub>/TiO<sub>2</sub> composite materials: Preparation, Characterization and photothermal properties**

Wei Li, Chao-chao Tao, Jian-Ping Tang<sup>b\*</sup>, Shengliang Zhong<sup>a\*</sup>

<sup>a</sup> *Key Lab of Fluorine and Silicon for Energy Materials and Chemistry of  
Ministry of Education, College of Chemistry and Chemical Engineering,  
Jiangxi Normal University, Nanchang, 330022, China*

<sup>b</sup> *Analytical and Testing Center, Jiangxi Normal University, Nanchang 330022,  
China*

\*corresponding author.

\*E-mail: slzhong@jxnu.edu.cn

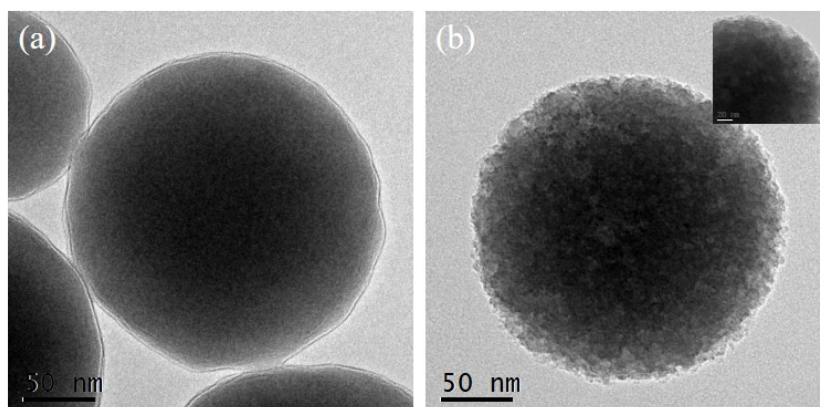

Figure S 1. (a) and (b) are the TEM images of SiO<sub>2</sub> and SiO<sub>2</sub>@TiO<sub>2</sub>, respectively.

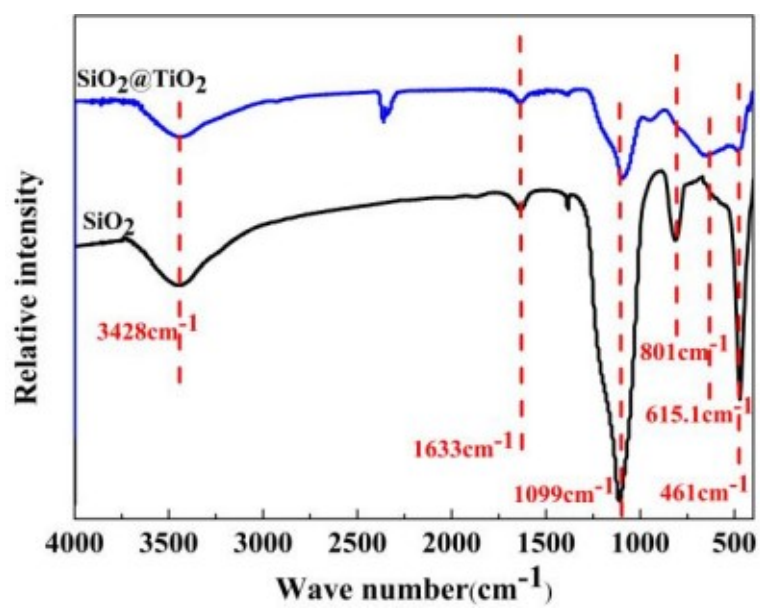

Figure S 2. FTIR spectra of SiO<sub>2</sub> and SiO<sub>2</sub>@TiO<sub>2</sub>.

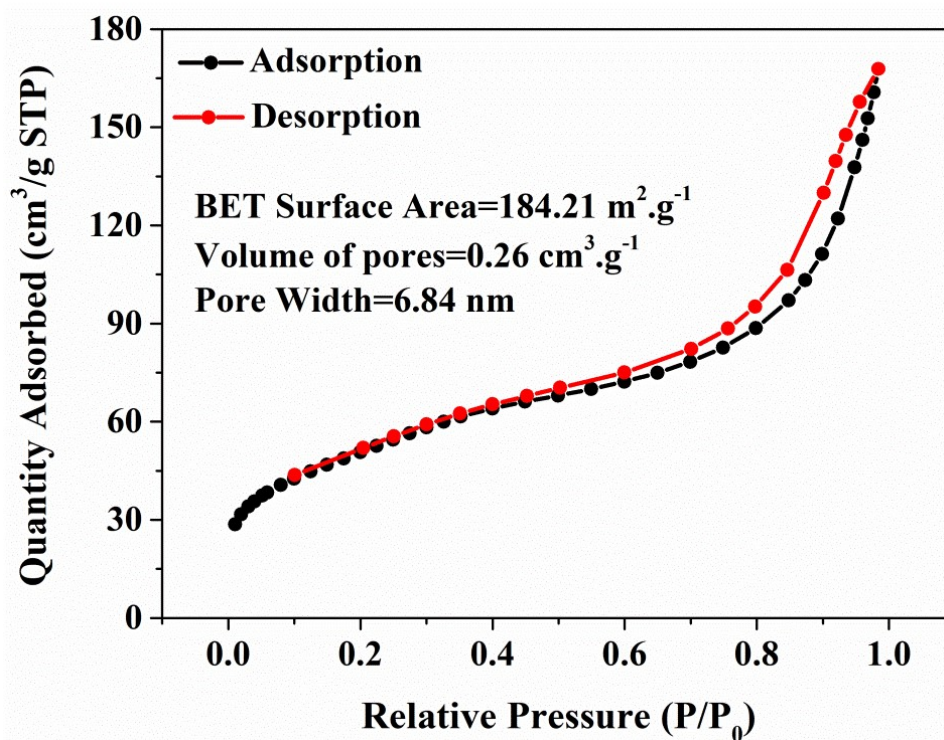

Figure S 3.  $\text{N}_2$  adsorption/desorption isotherms of  $\text{SiO}_2@\text{TiO}_2$ .

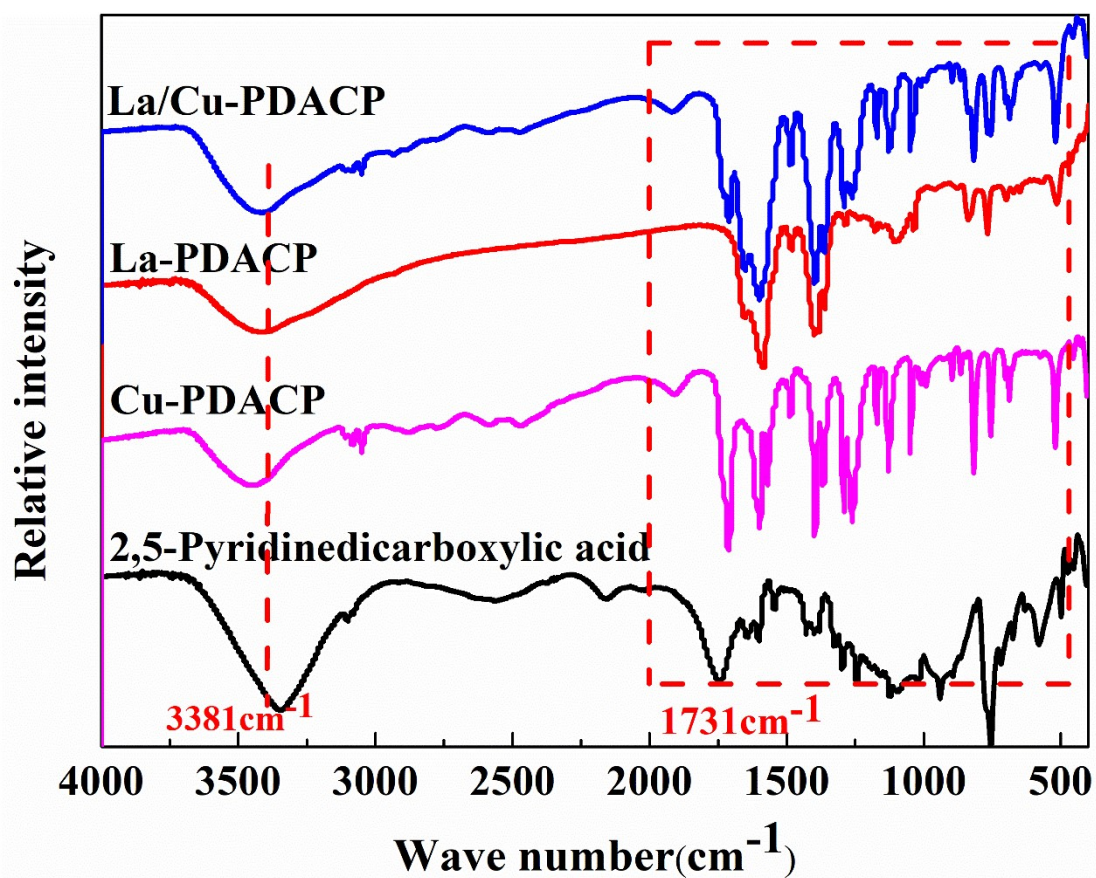

Figure S 4. FTIR spectra of 2,5-Pyridinedicarboxylic acid, La-PDACP, Cu-PDACP and La/Cu-PDACP.

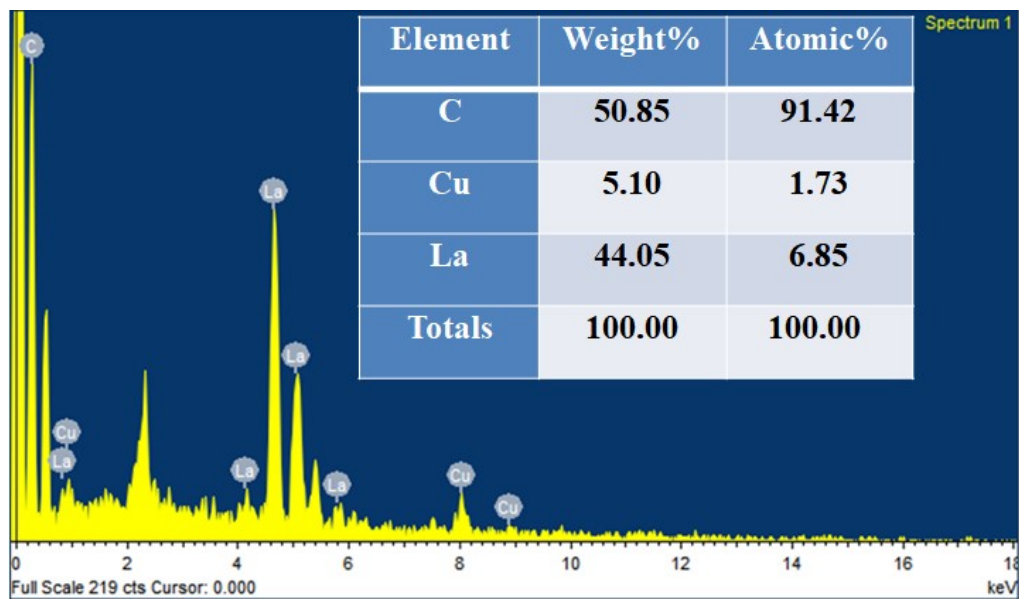

Figure S5. EDX of La/Cu-PDACP

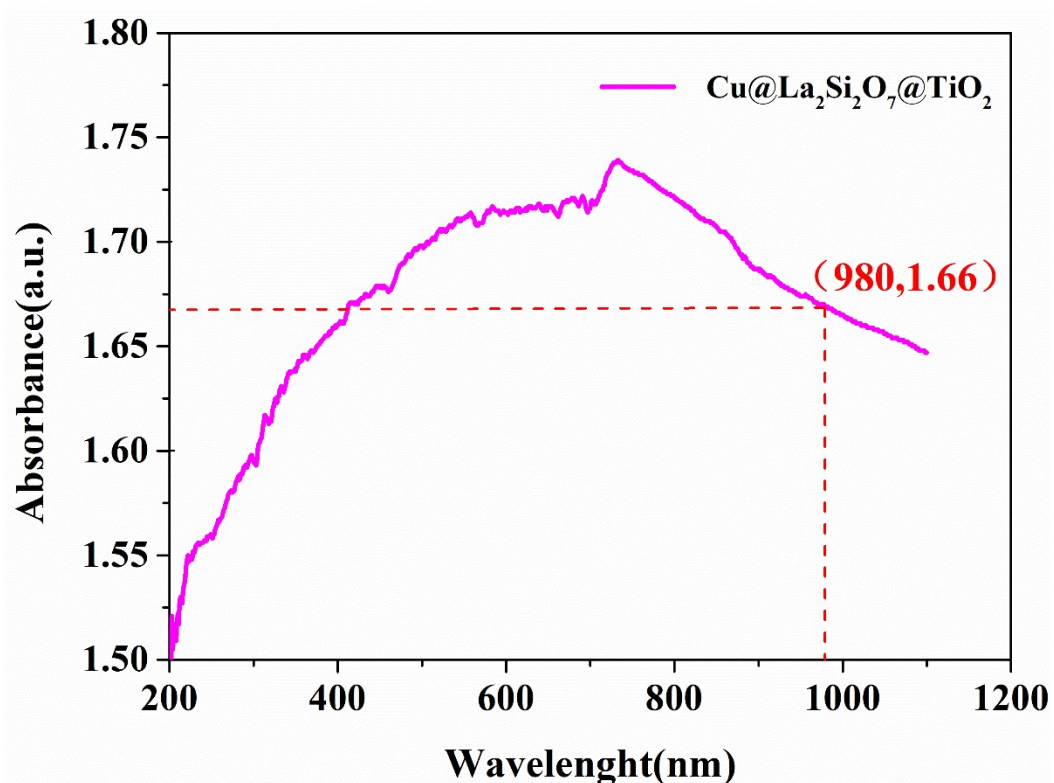

Figure S6. UV spectra of Cu/La<sub>2</sub>Si<sub>2</sub>O<sub>7</sub>/TiO<sub>2</sub>.



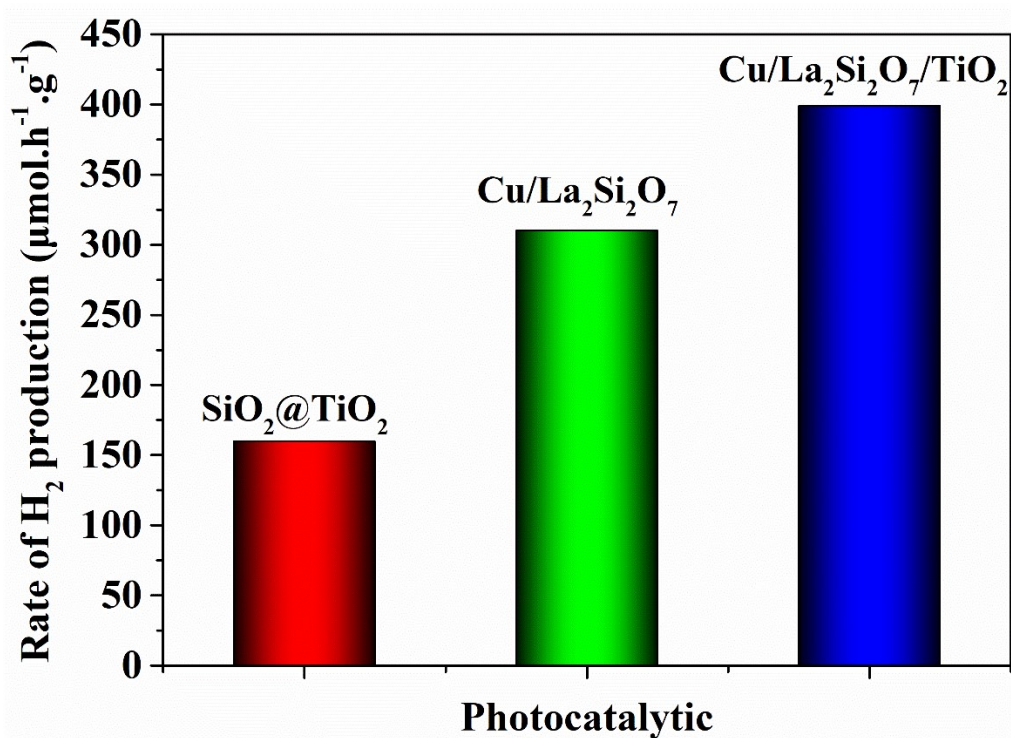

Figure S7. Photocatalytic hydrogen production rate diagram of SiO<sub>2</sub>@TiO<sub>2</sub>, Cu/La<sub>2</sub>Si<sub>2</sub>O<sub>7</sub> and Cu/La<sub>2</sub>Si<sub>2</sub>O<sub>7</sub>/TiO<sub>2</sub>.
